# Supplementary material for: Teaching Mathematics with Technology: TPACK and Effective Teaching Practices
Source: MDPI journal article supplement (doi:10.3390/educsci12020133), 2022-02-18

### Normality Tests

| Variable                                         | Shapiro-Wilk Statistic | df | Sig.   |
|--------------------------------------------------|------------------------|----|--------|
| Pre Overarching Concept                          | 0.875                  | 17 | 0.026* |
| Pre Knowledge of Students                        | 0.923                  | 17 | 0.168  |
| Pre Knowledge of Curriculum                      | 0.874                  | 17 | 0.025* |
| Pre Instructional Strategies                     | 0.948                  | 17 | 0.419  |
| Pre TPACK Overall Mean                           | 0.958                  | 17 | 0.587  |
| Pre MCOP <sup>2</sup> Student Engagement Mean    | 0.934                  | 17 | 0.253  |
| Pre MCOP <sup>2</sup> Teacher Facilitation Mean  | 0.952                  | 17 | 0.486  |
| Pre MCOP <sup>2</sup> Overall Mean               | 0.942                  | 17 | 0.343  |
| Post Overarching Concept                         | 0.854                  | 17 | 0.012* |
| Post Knowledge of Students                       | 0.898                  | 17 | 0.064  |
| Post Knowledge of Curriculum                     | 0.871                  | 17 | 0.023* |
| Post Instructional Strategies                    | 0.790                  | 17 | 0.002* |
| Post TPACK Overall Mean                          | 0.888                  | 17 | 0.044* |
| Post MCOP <sup>2</sup> Student Engagement Mean   | 0.971                  | 17 | 0.829  |
| Post MCOP <sup>2</sup> Teacher Facilitation Mean | 0.940                  | 17 | 0.319  |
| Post MCOP <sup>2</sup> Overall Mean              | 0.960                  | 17 | 0.640  |
| Gain TPACK Overarching Concept                   | 0.936                  | 17 | 0.279  |
| Gain TPACK Knowledge of Students                 | 0.876                  | 17 | 0.027* |
| Gain TPACK Knowledge of Curriculum               | 0.897                  | 17 | 0.06   |
| Gain TPACK Instructional Strategies              | 0.948                  | 17 | 0.422  |
| Gain TPACK Overall Mean                          | 0.949                  | 17 | 0.446  |
| Gain MCOP <sup>2</sup> Teacher Facilitation      | 0.934                  | 17 | 0.256  |
| Gain MCOP <sup>2</sup> Student Engagement        | 0.955                  | 17 | 0.537  |
| Gain MCOP <sup>2</sup> Overall Mean              | 0.976                  | 17 | 0.914  |

\*p < 0.05.

Normal Q-Q Plot of Pre Overarching Concept

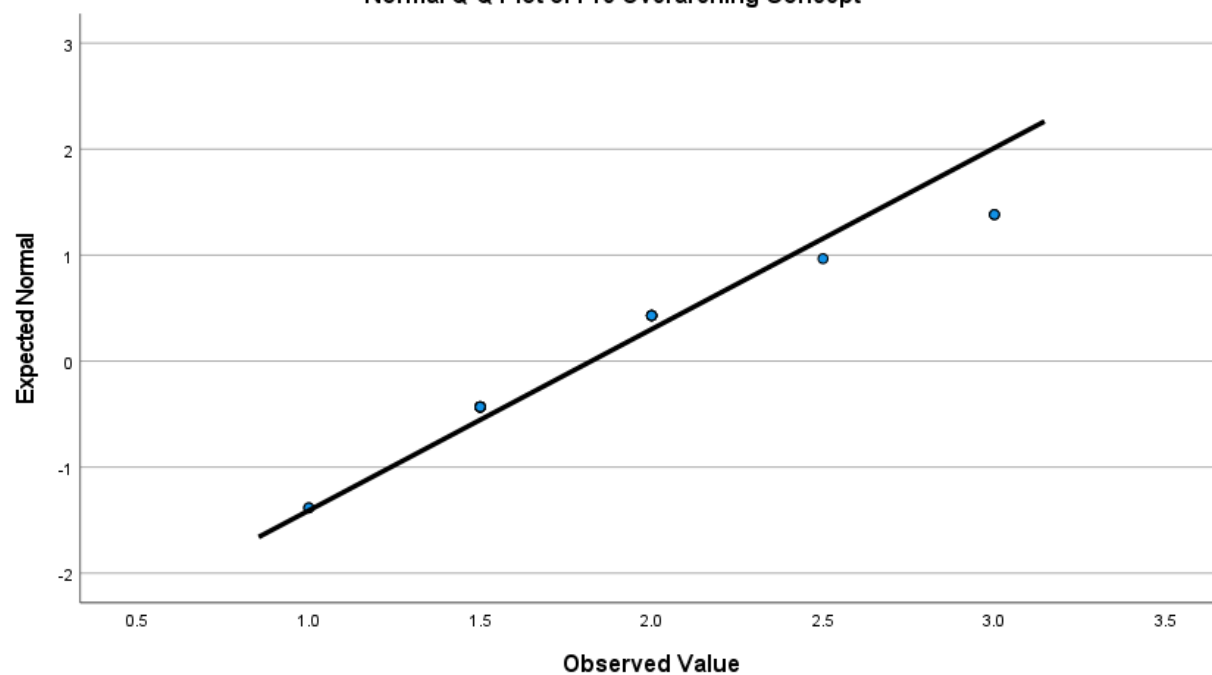

Normal Q-Q Plot of Pre Knowledge of Students

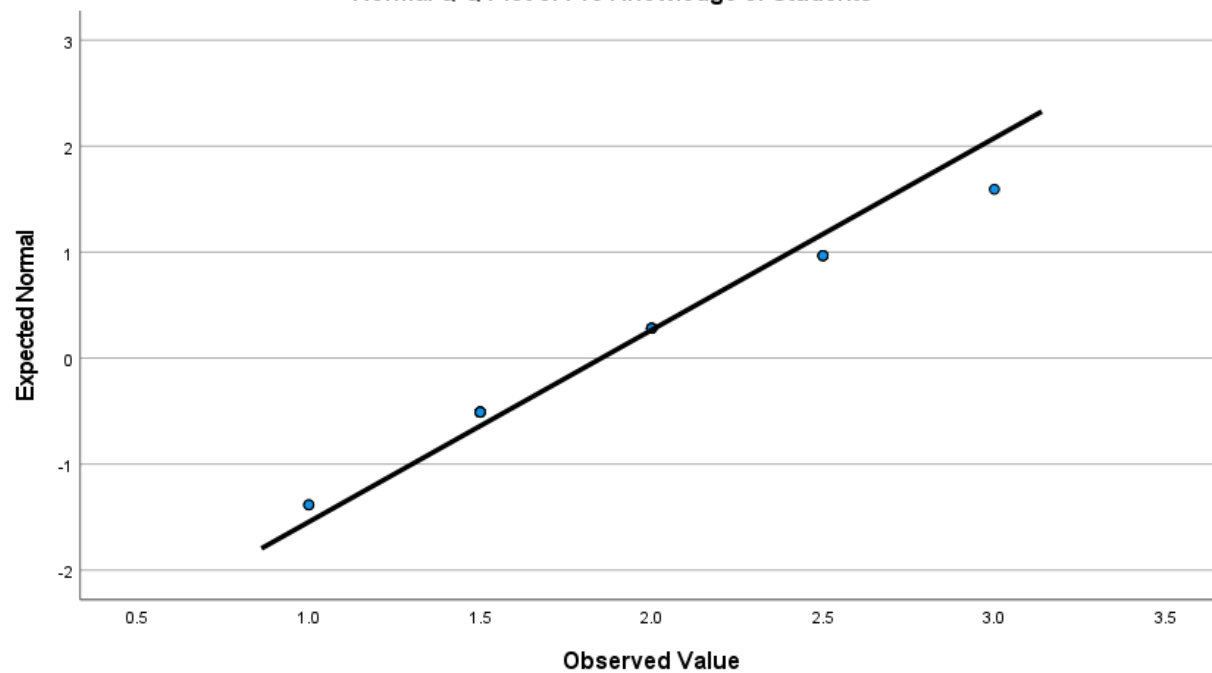

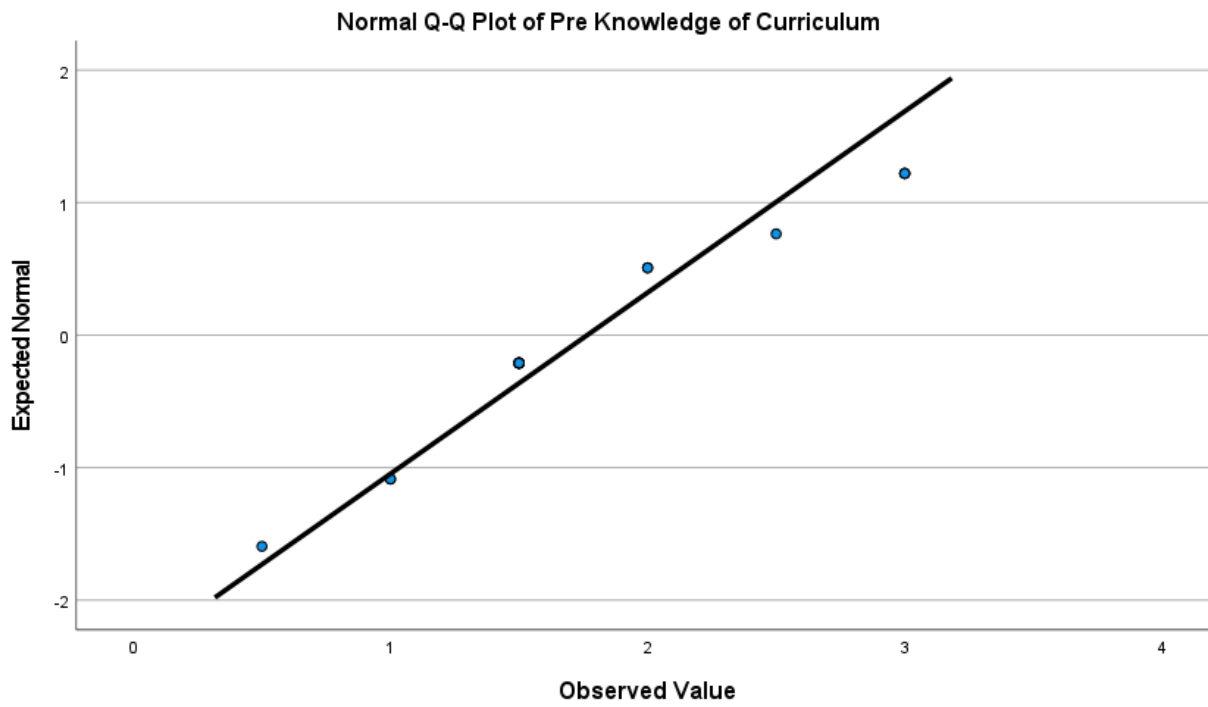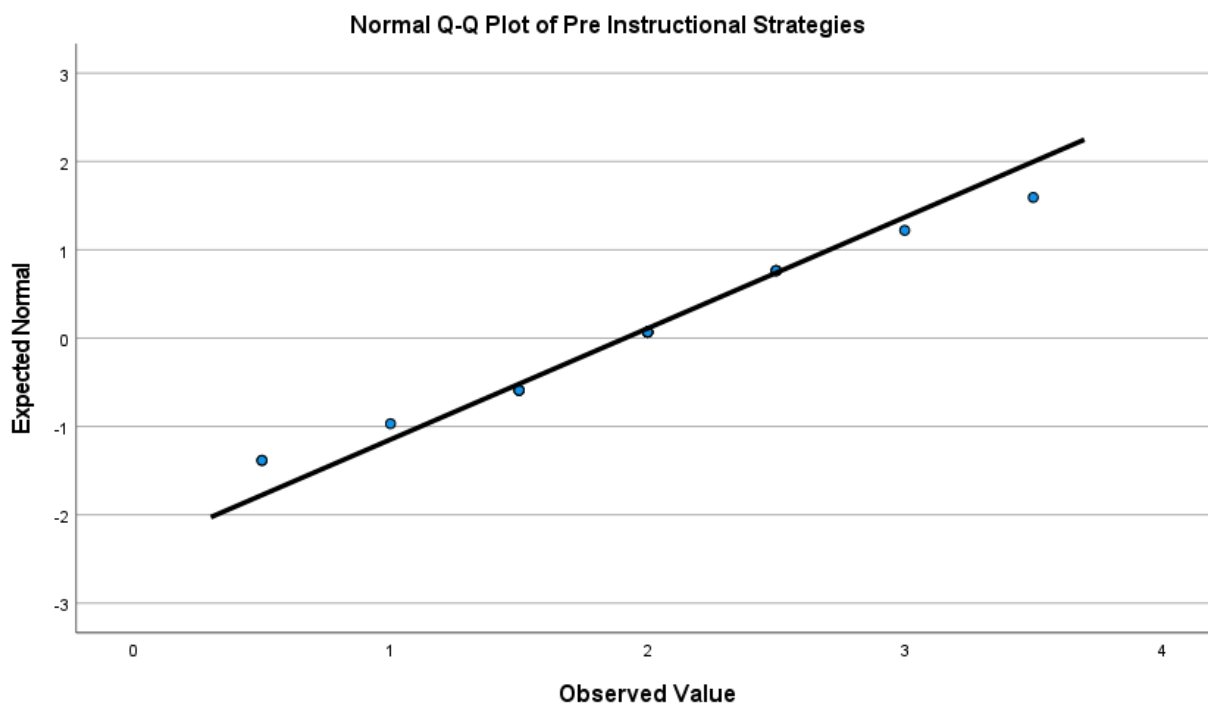

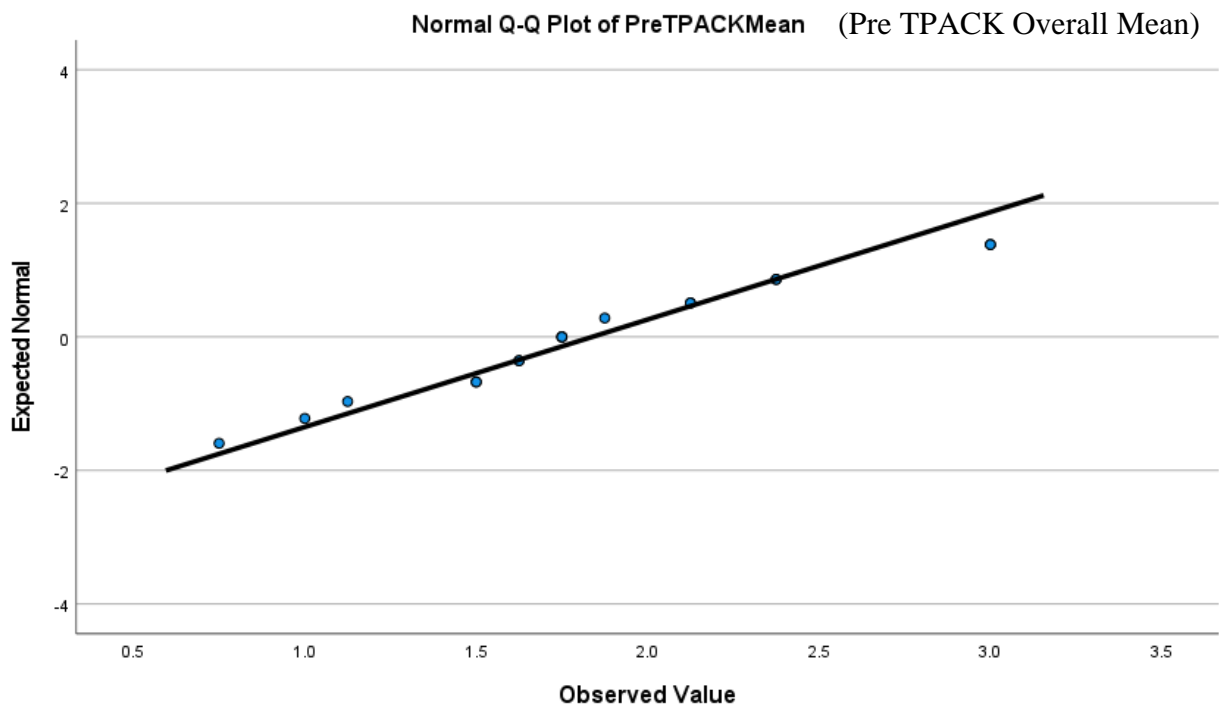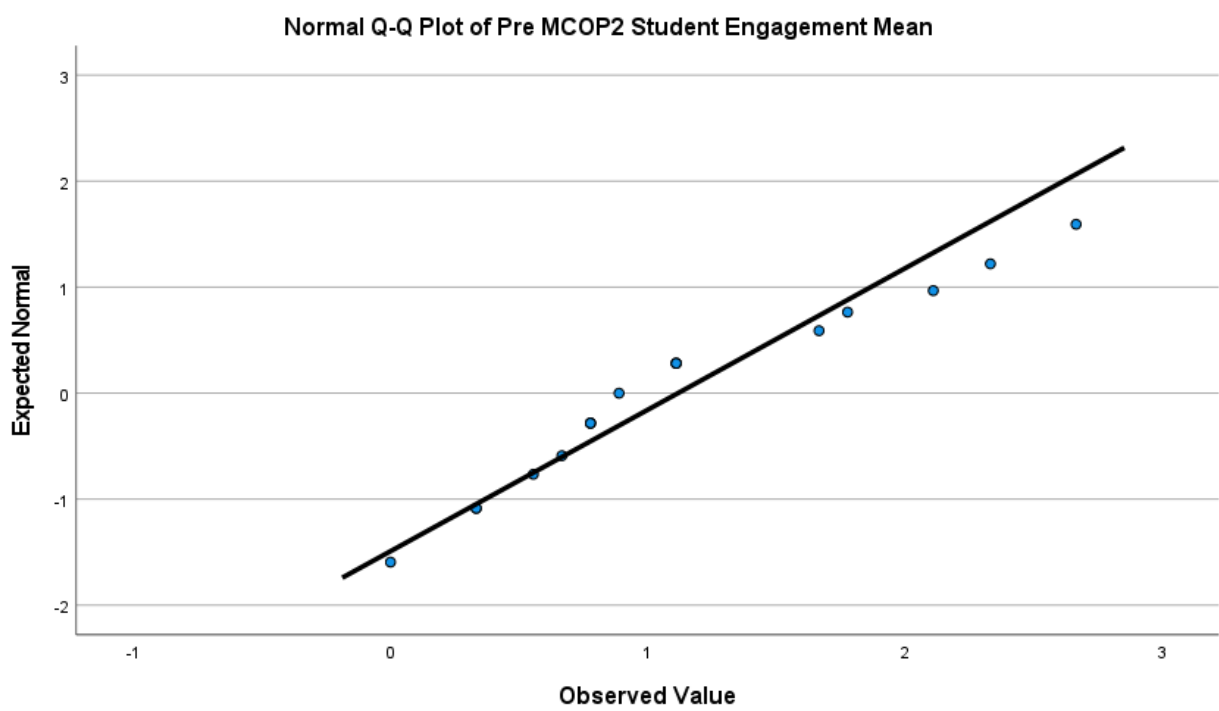

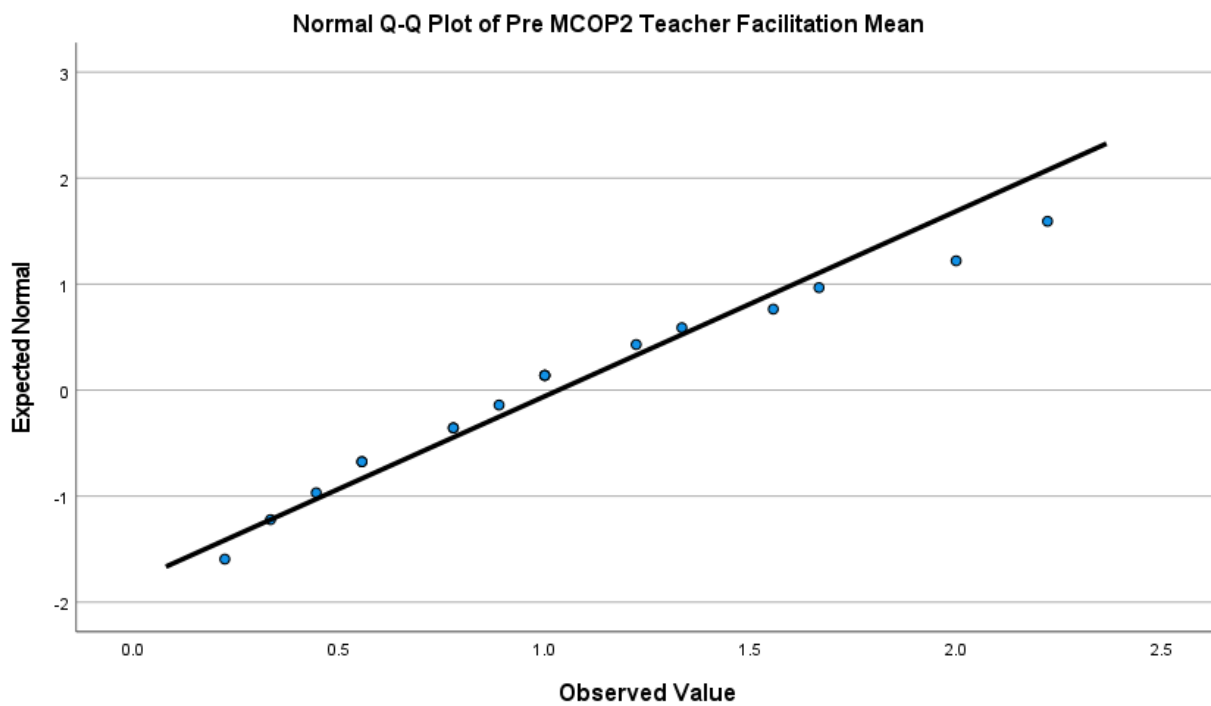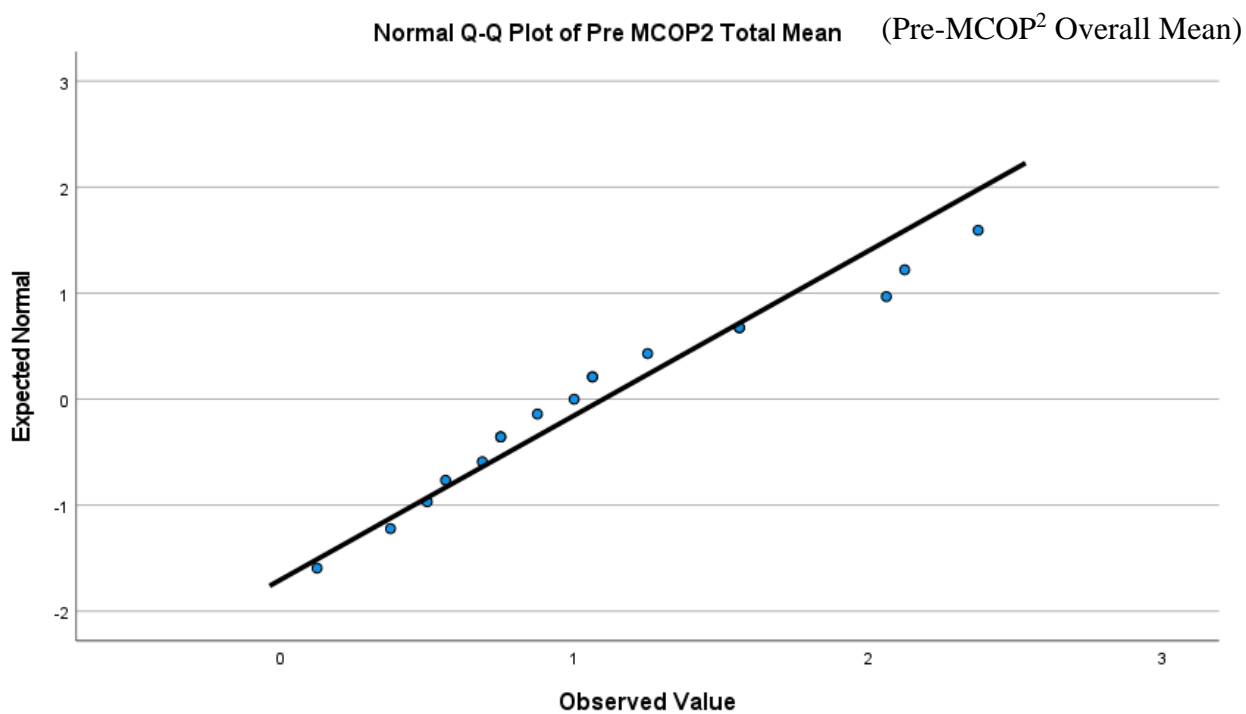

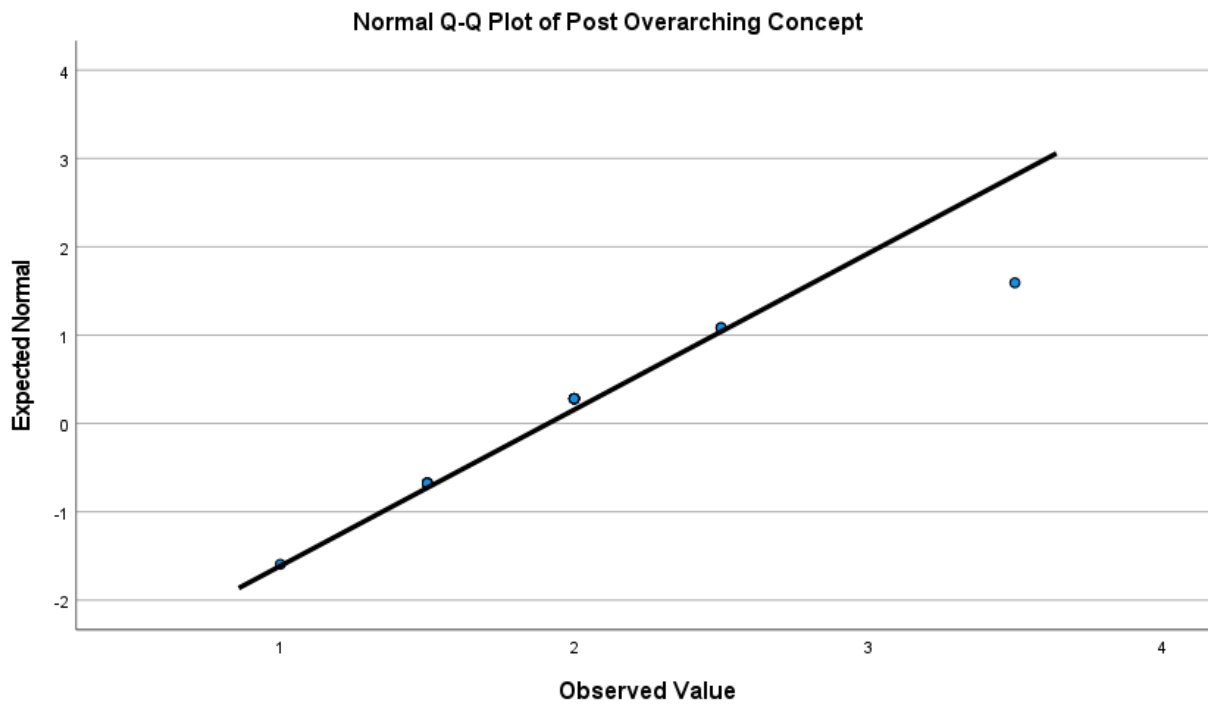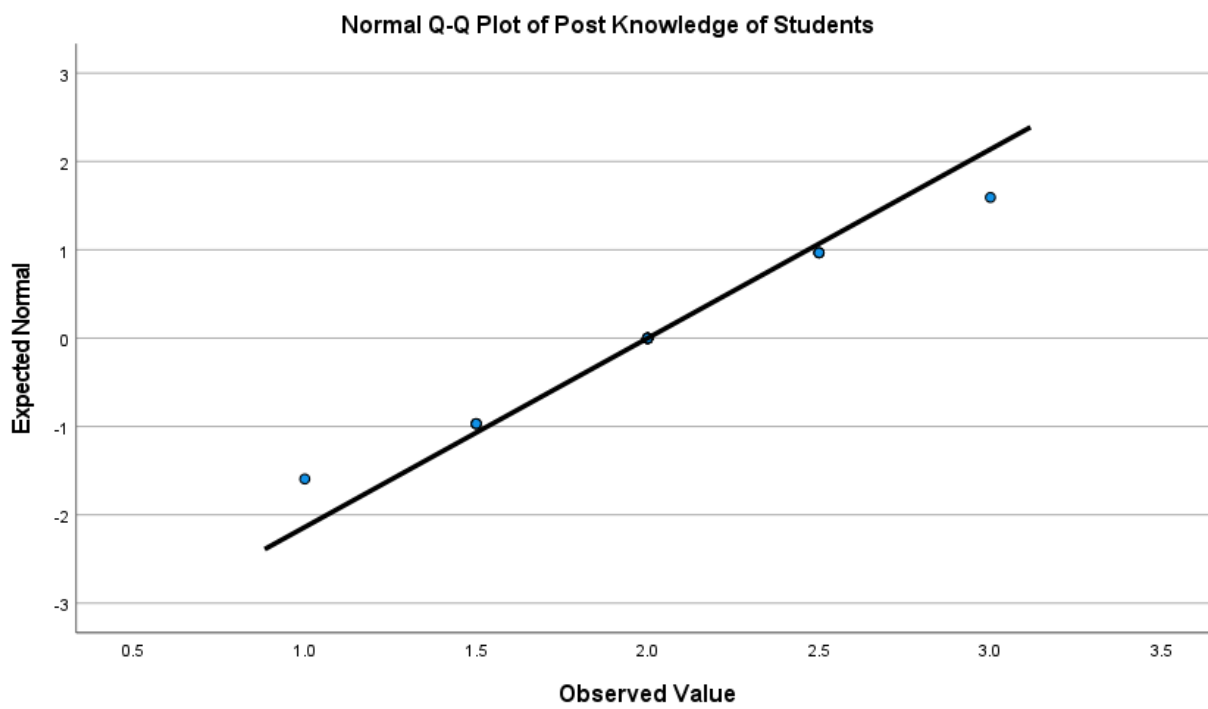

Normal Q-Q Plot of Post Knowledge of Curriculum

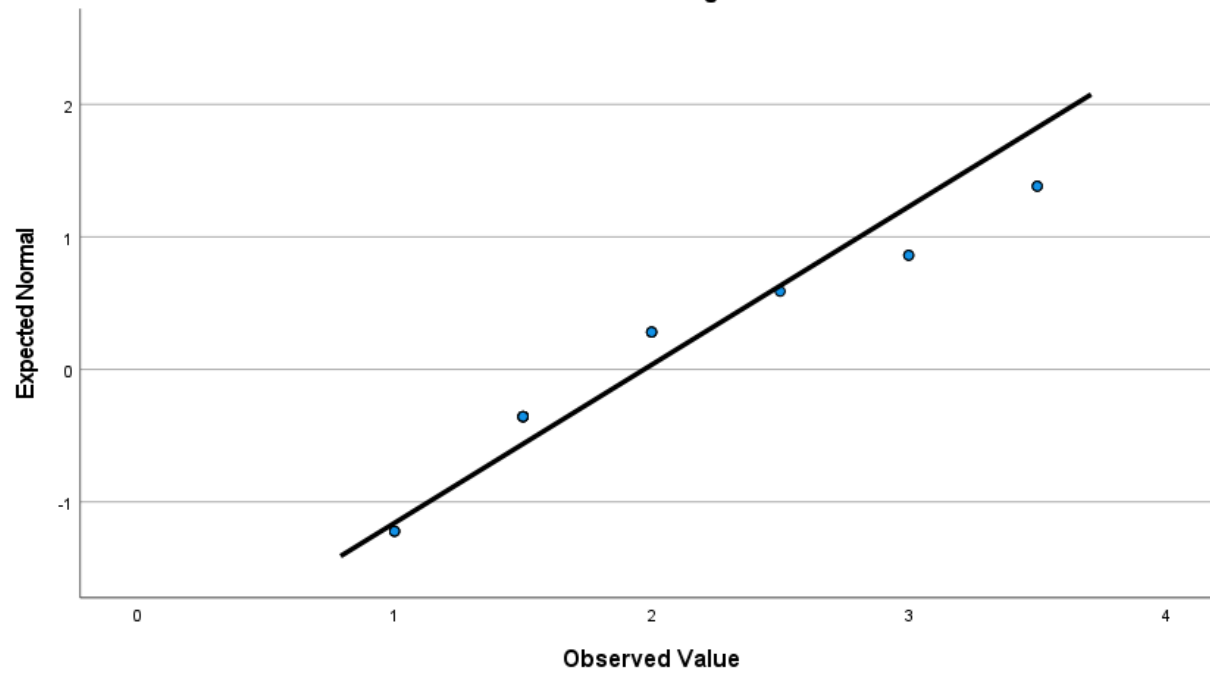

Normal Q-Q Plot of Post Instructional Strategies

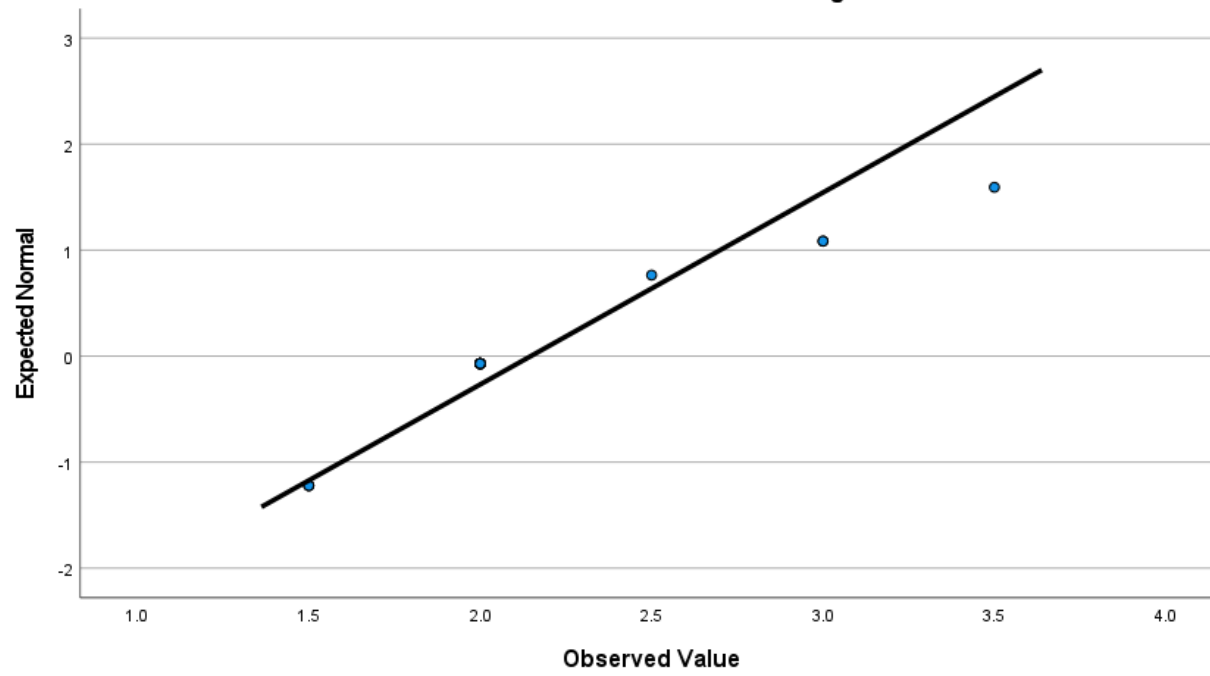

Normal Q-Q Plot of PostTPACKMean (Post TPACK Overall Mean)

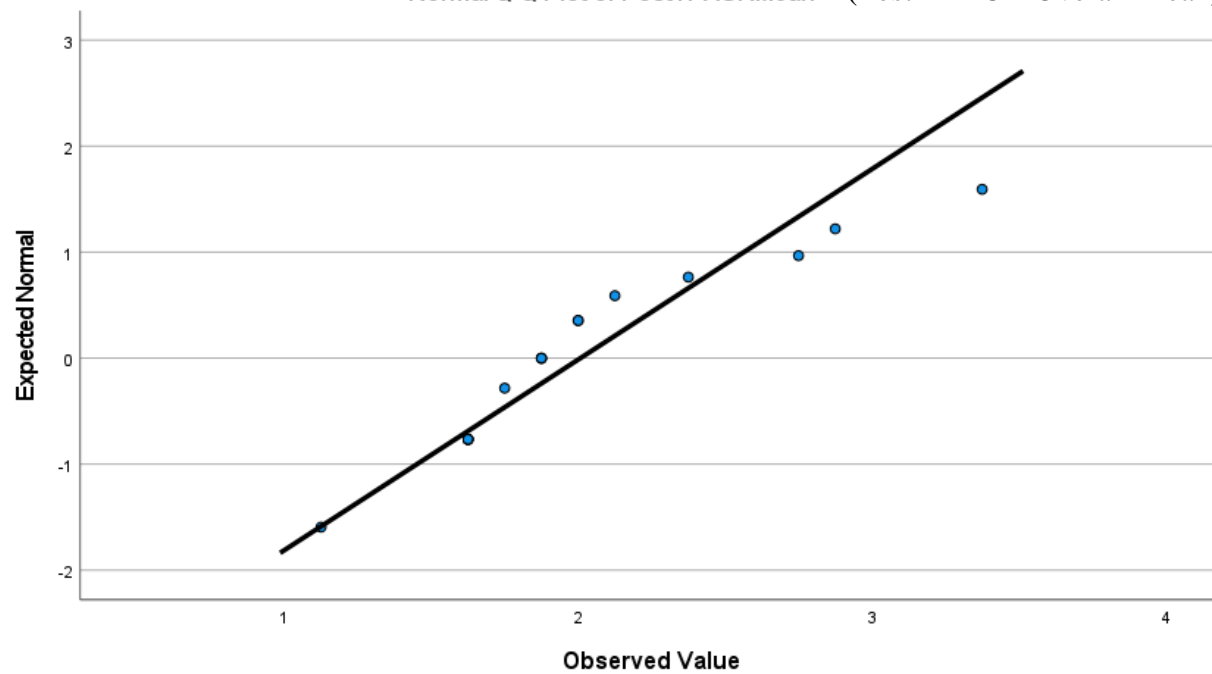

Normal Q-Q Plot of Post MCOP2 Student Engagement Mean

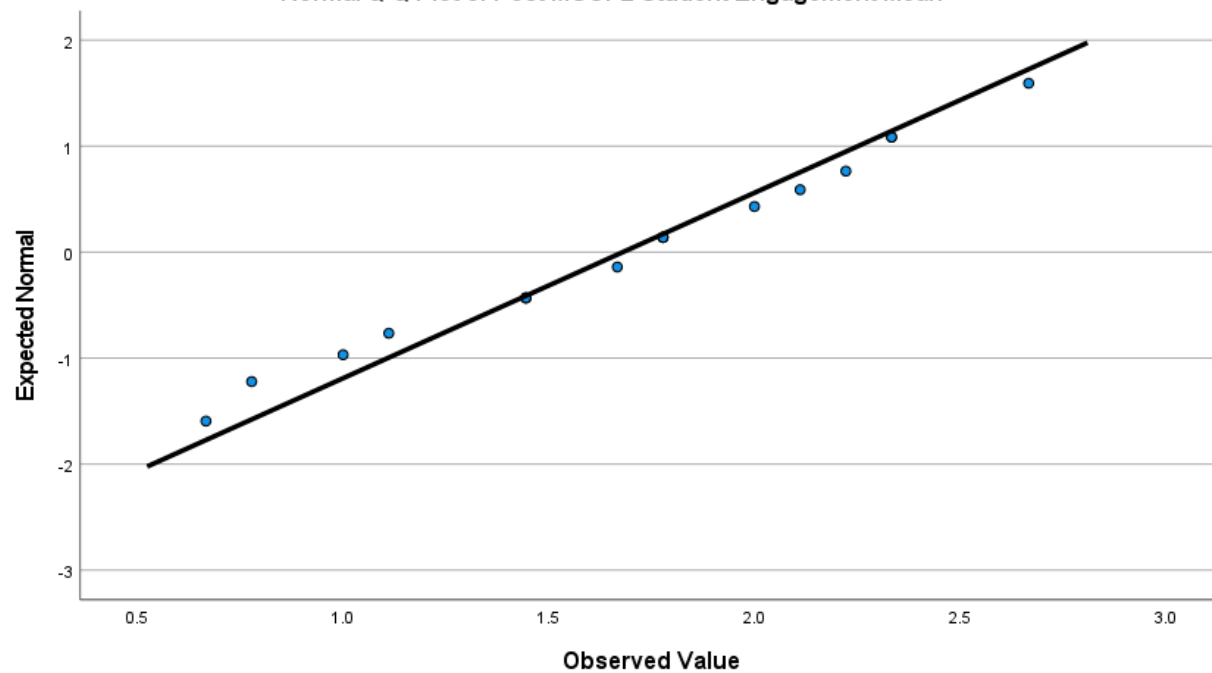



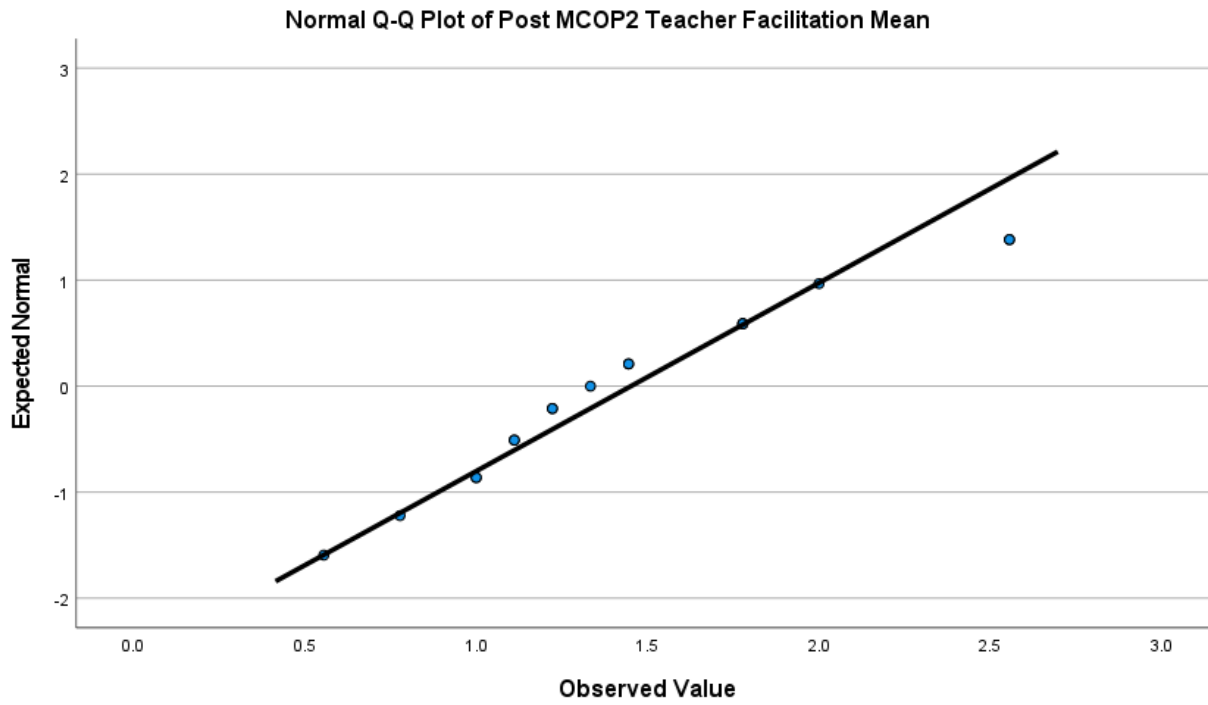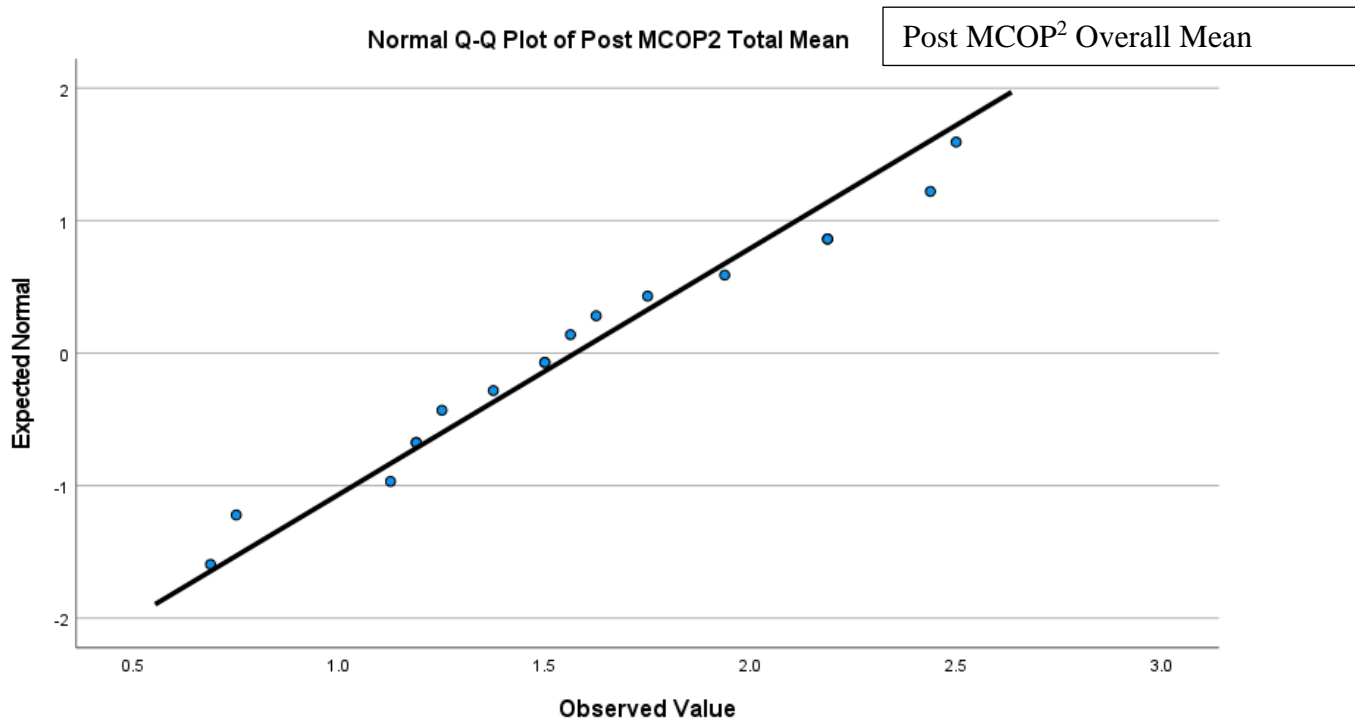

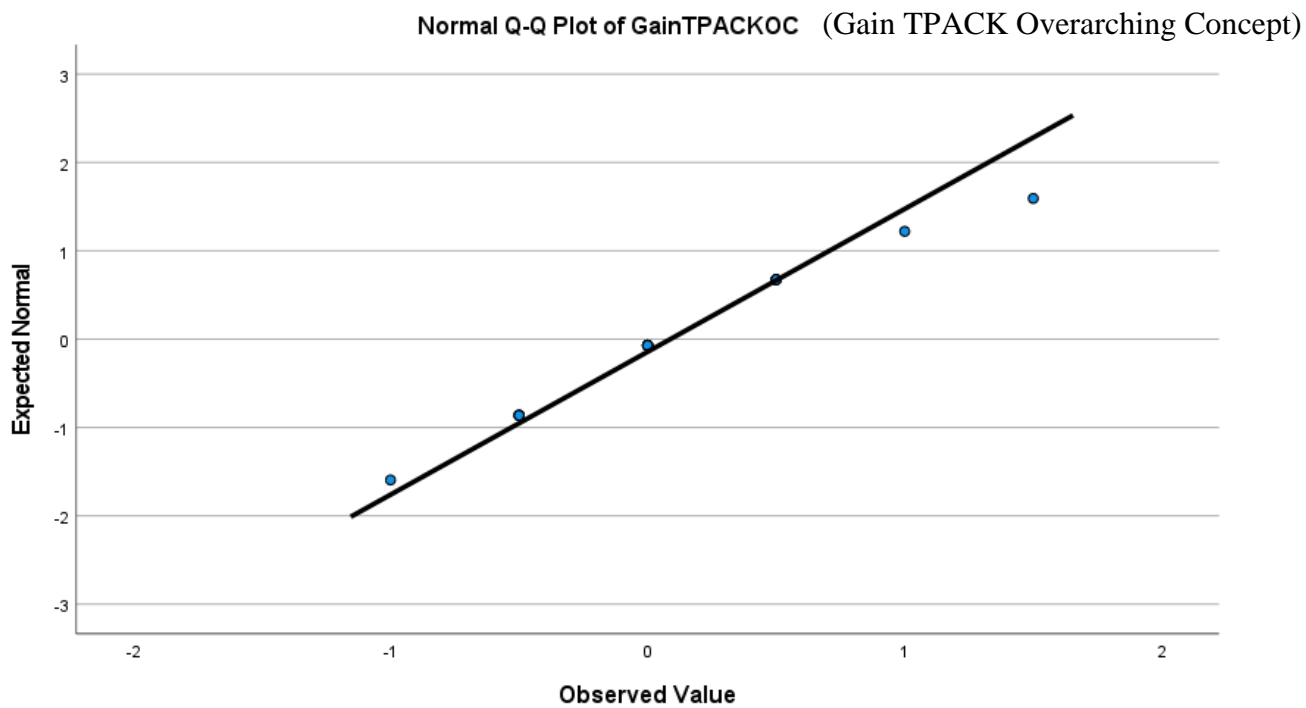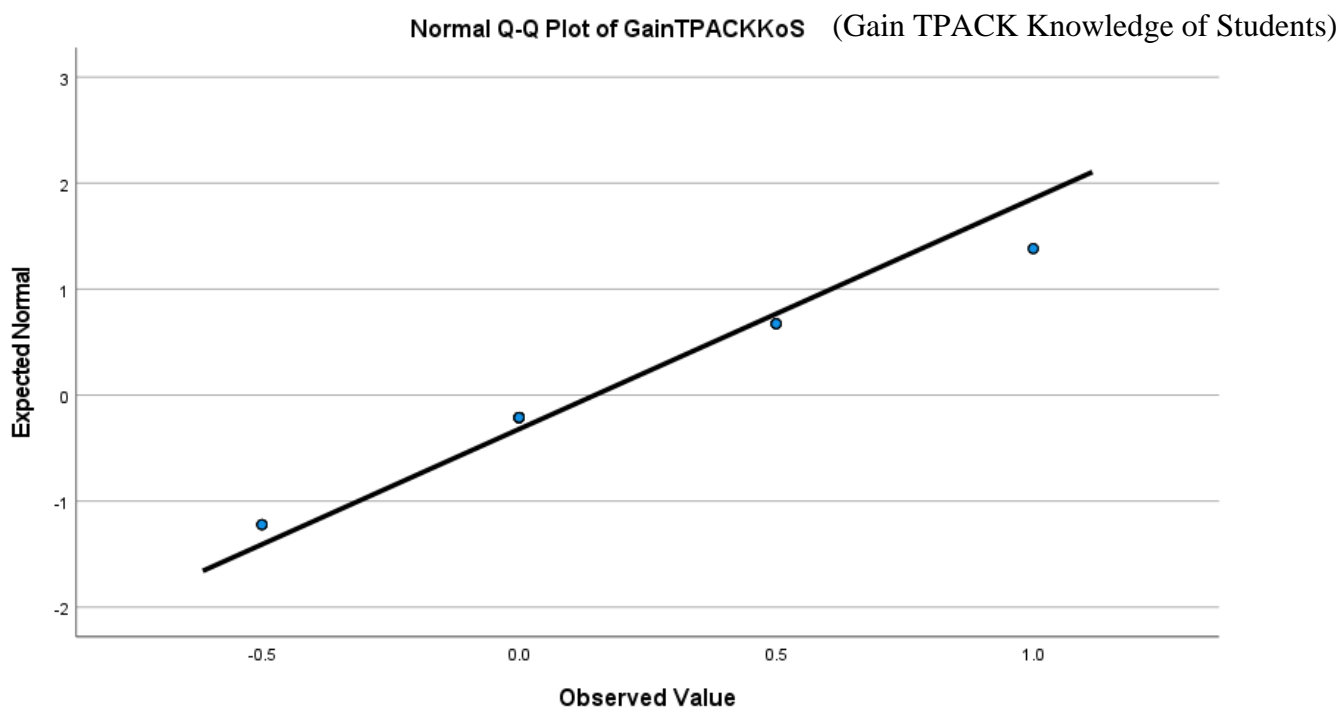

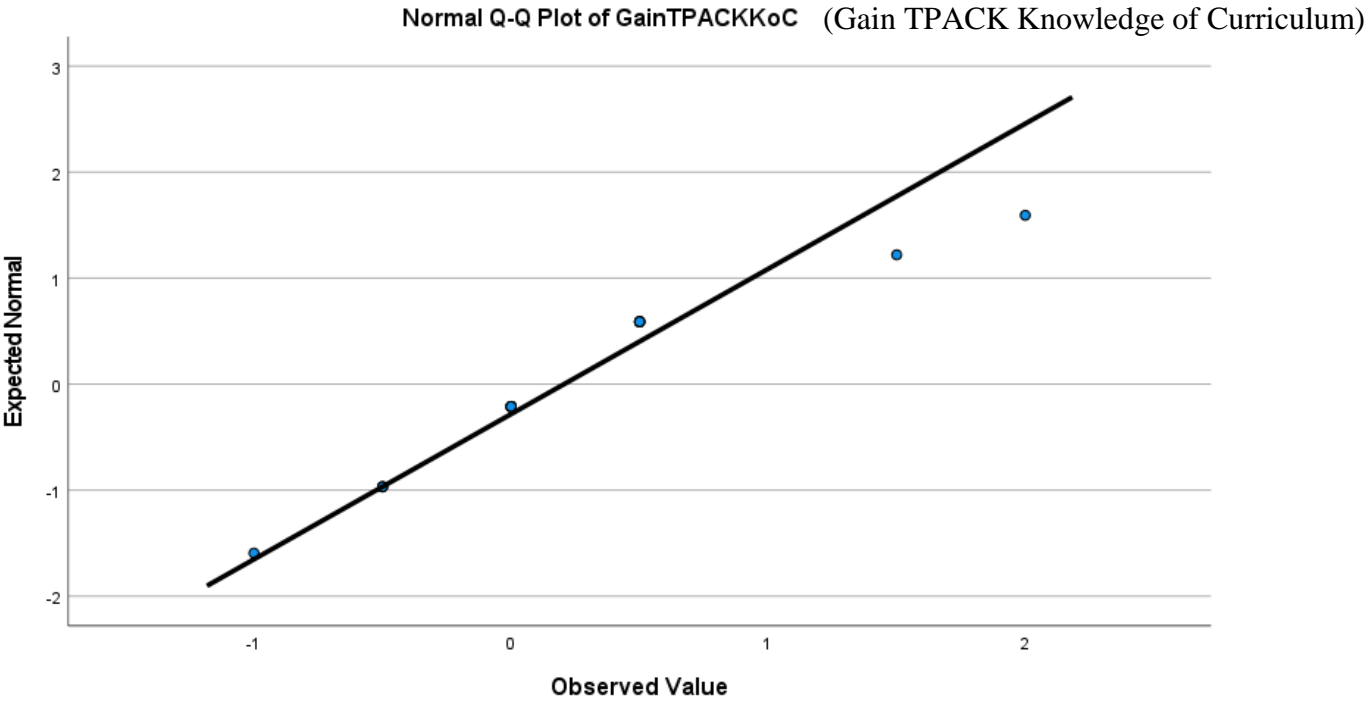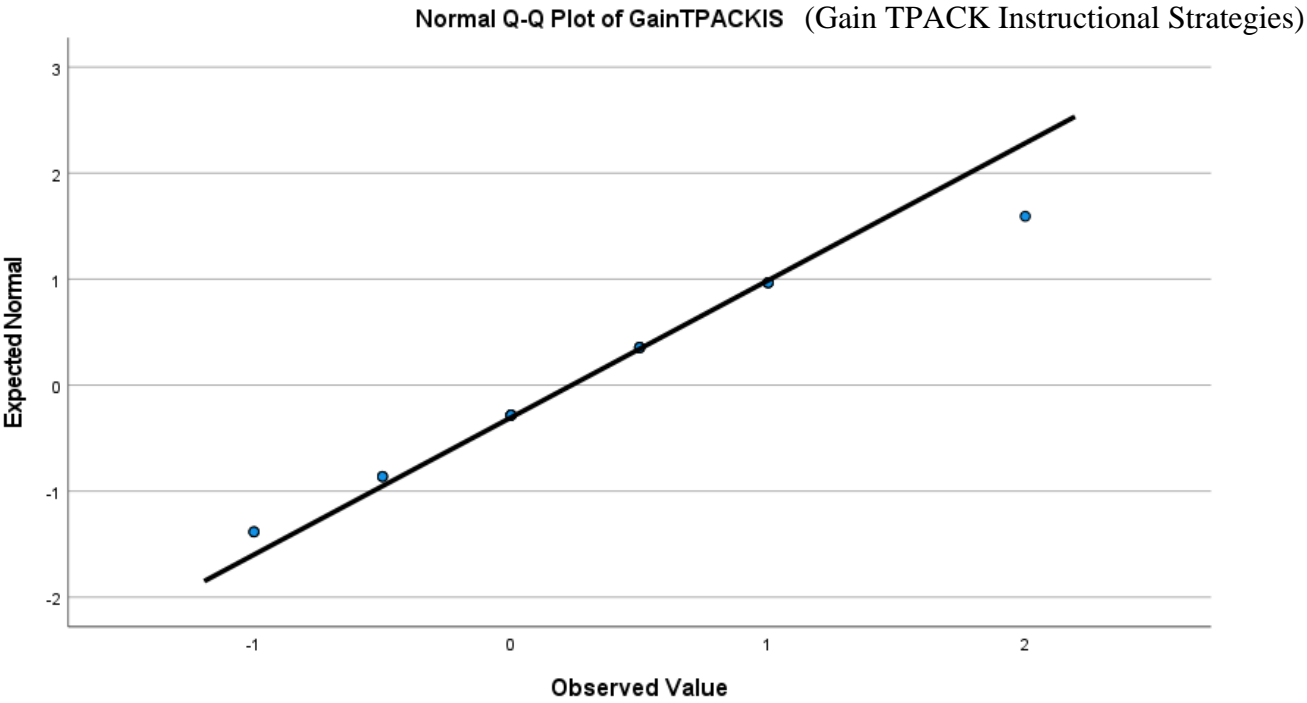

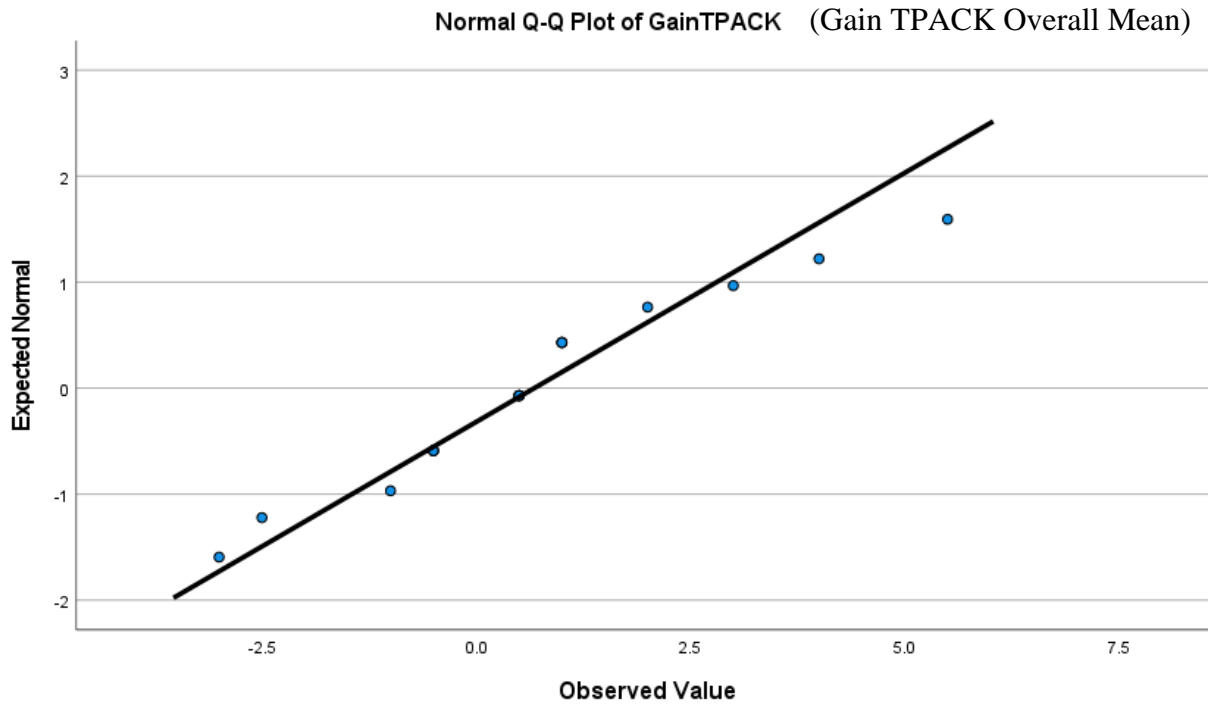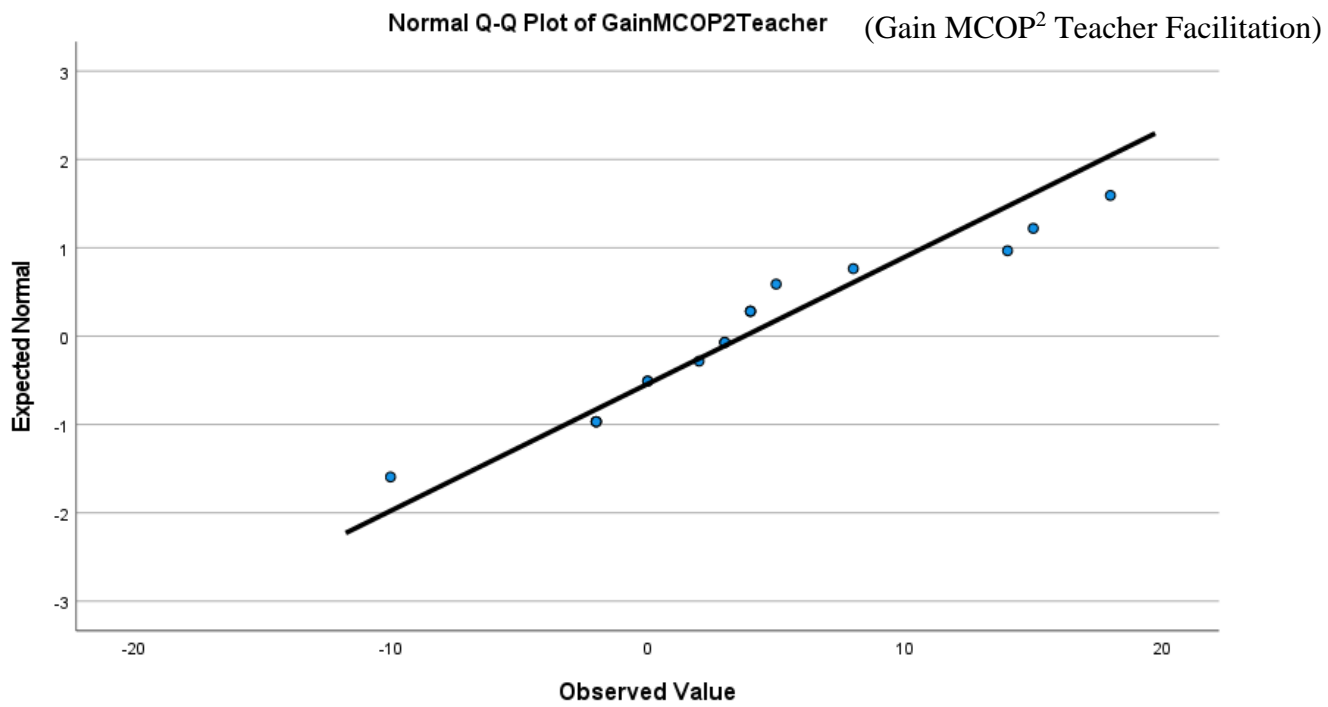

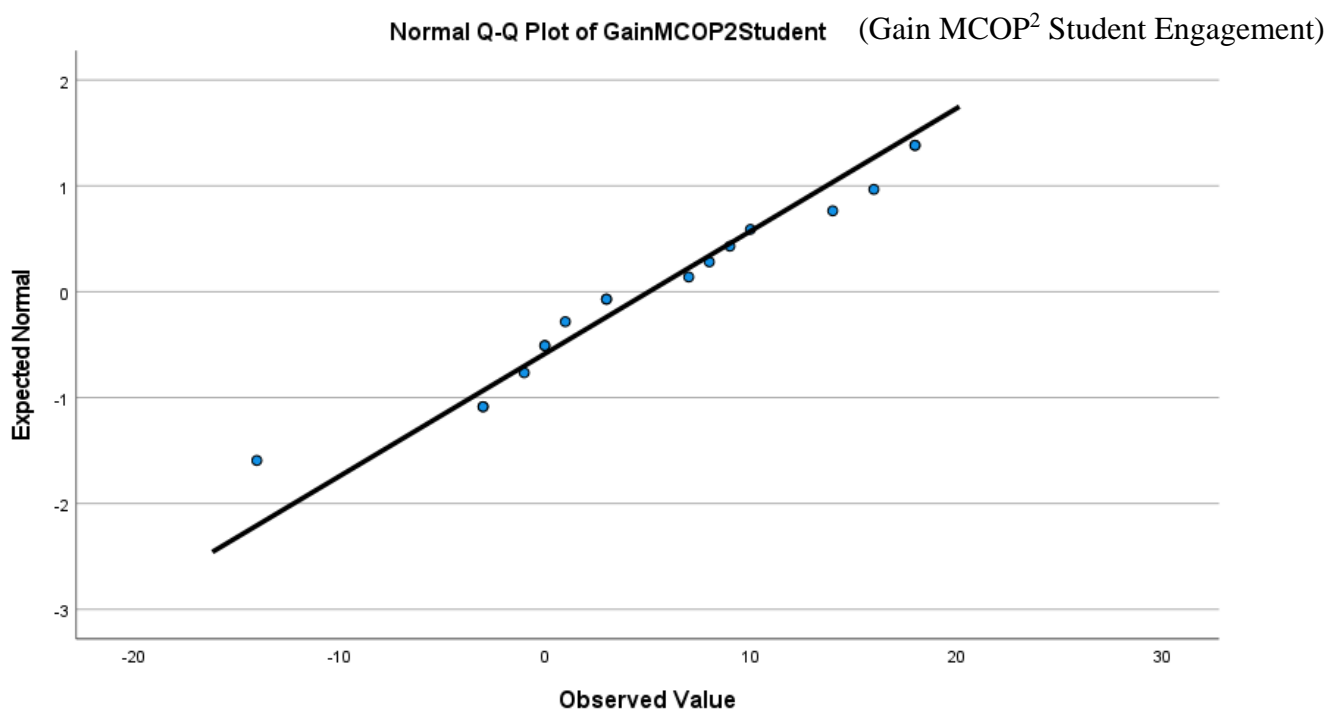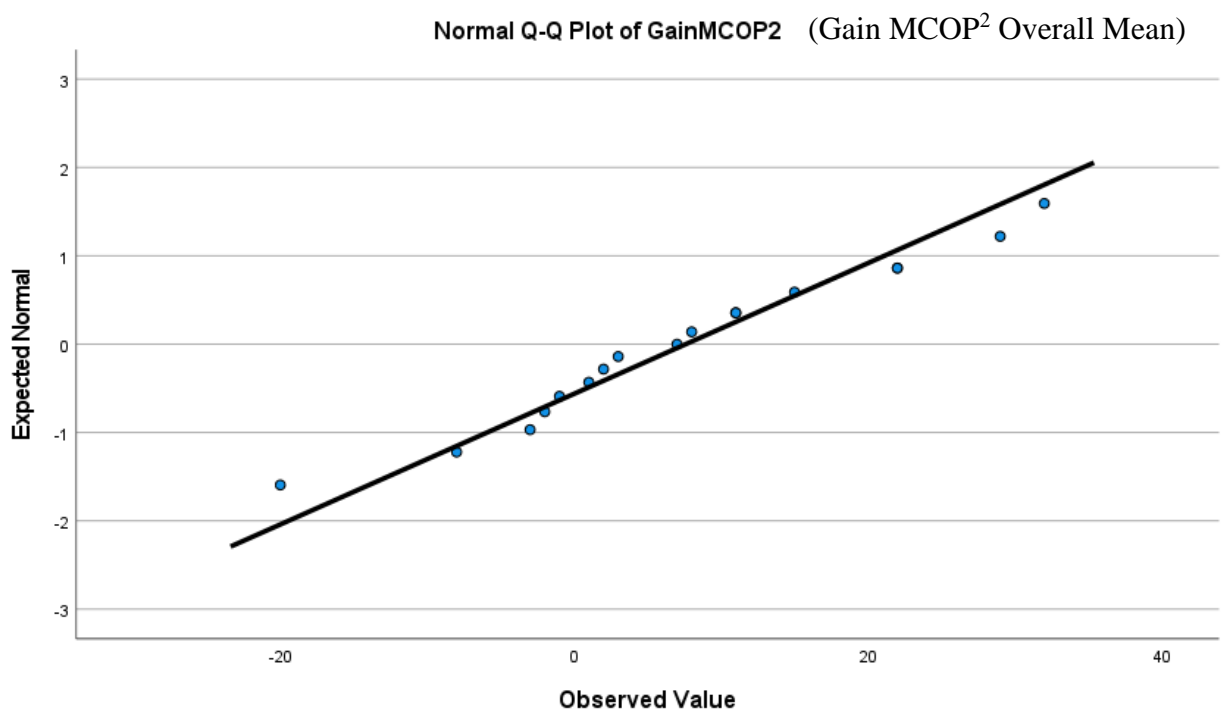

Supplement: s1 [file s1]
